# Supplementary material for: Anti-proliferative activity and DNA/BSA interactions of five mono- or di-organotin(iv) compounds derived from 2-hydroxy-N′-[(2-hydroxy-3-methoxyphenyl)methylidene]-benzohydrazone
Source: Royal Society of Chemistry journal article supplement (doi:10.1039/c6nj00525j), 2016-01-01
Supplement: c6nj00525j1.pdf [file c6nj00525j1.pdf]

# New Journal of Chemistry

## Supporting Information

**Anti-proliferative activity and DNA/BSA interactions of five mono- or di-organotin(IV) compounds derived from 2-hydroxy-N'-[(2-hydroxy-3-methoxyphenyl)methylidene]-benzohydrazone**

**Min Hong,<sup>†</sup> Guoliang Chang,<sup>†</sup> Rui Li, Meiju Niu\***

School of Chemistry and Chemical Engineering, Liaocheng University, Liaocheng 252059, China.

---

\* Corresponding author. Tel.: +866358230633; Fax: +866358239121.  
*E-mail address:* niumeiju@163.com (M.J. Niu).

Table S1 Selected bond lengths (Å) and angles (°) for complexes **1-5**.

---

| <b>Complex 1</b>  |            |                  |            |
|-------------------|------------|------------------|------------|
| Sn(1)-C(17)       | 2.094(5)   | O(2)-C(7)        | 1.273(6)   |
| Sn(1)-C(16)       | 2.100(5)   | O(3)-C(14)       | 1.329(6)   |
| Sn(1)-O(3)        | 2.198(3)   | N(1)-C(7)        | 1.329(6)   |
| Sn(1)-O(2)        | 2.199(3)   | N(1)-N(2)        | 1.399(5)   |
| Sn(1)-N(2)        | 2.258(4)   | N(2)-C(8)        | 1.284(6)   |
| C(17)-Sn(1)-C(16) | 163.4(2)   | C(17)-Sn(1)-O(3) | 94.03(17)  |
| O(3)-Sn(1)-O(2)   | 151.41(13) | C(16)-Sn(1)-O(3) | 91.84(18)  |
| C(17)-Sn(1)-N(2)  | 94.09(19)  | C(17)-Sn(1)-O(2) | 93.41(18)  |
| C(16)-Sn(1)-N(2)  | 102.10(19) | C(16)-Sn(1)-O(2) | 88.76(18)  |
| O(3)-Sn(1)-N(2)   | 81.16(14)  | O(2)-Sn(1)-N(2)  | 70.79(14)  |
| <b>Complex 2</b>  |            |                  |            |
| Sn(1)-O(3)        | 2.050(3)   | O(2)-C(7)        | 1.299(4)   |
| Sn(1)-C(22)       | 2.122(4)   | O(3)-C(14)       | 1.329(4)   |
| Sn(1)-C(16)       | 2.122(4)   | N(1)-C(7)        | 1.320(5)   |
| Sn(1)-O(2)        | 2.125(2)   | N(1)-N(2)        | 1.394(4)   |
| Sn(1)-N(2)        | 2.169(3)   | N(2)-C(8)        | 1.307(5)   |
| C(22)-Sn(1)-C(16) | 115.25(13) | O(2)-Sn(1)-N(2)  | 73.18(10)  |
| O(3)-Sn(1)-O(2)   | 155.64(11) | O(3)-Sn(1)-C(22) | 99.78(14)  |
| O(3)-Sn(1)-N(2)   | 83.41(11)  | O(3)-Sn(1)-C(16) | 95.81(13)  |
| C(22)-Sn(1)-N(2)  | 114.86(12) | C(22)-Sn(1)-O(2) | 96.18(13)  |
| C(16)-Sn(1)-N(2)  | 129.22(12) | C(16)-Sn(1)-O(2) | 93.86(12)  |
| <b>Complex 3</b>  |            |                  |            |
| Sn(1)-C(20)       | 2.109(4)   | O(2)-C(7)        | 1.282(4)   |
| Sn(1)-C(16)       | 2.117(3)   | O(3)-C(14)       | 1.325(4)   |
| Sn(1)-O(3)        | 2.165(2)   | N(1)-C(7)        | 1.309(5)   |
| Sn(1)-N(2)        | 2.211(3)   | N(1)-N(2)        | 1.391(4)   |
| Sn(1)-O(2)        | 2.213(3)   | N(2)-C(8)        | 1.284(4)   |
| C(20)-Sn(1)-C(16) | 151.37(15) | C(20)-Sn(1)-O(3) | 97.67(13)  |
| C(20)-Sn(1)-N(2)  | 106.74(12) | C(16)-Sn(1)-O(3) | 94.06(12)  |
| C(16)-Sn(1)-N(2)  | 100.70(12) | C(20)-Sn(1)-O(2) | 89.36(13)  |
| O(3)-Sn(1)-N(2)   | 81.92(10)  | C(16)-Sn(1)-O(2) | 92.20(13)  |
| O(3)-Sn(1)-O(2)   | 152.45(10) | N(2)-Sn(1)-O(2)  | 70.55(10)  |
| <b>Complex 4</b>  |            |                  |            |
| Sn(1)-C(16)       | 2.120(5)   | O(2)-C(7)        | 1.289(6)   |
| Sn(1)-C(24)       | 2.111(5)   | O(3)-C(14)       | 1.331(5)   |
| Sn(1)-O(3)        | 2.175(3)   | N(1)-C(7)        | 1.311(6)   |
| Sn(1)-N(2)        | 2.214(4)   | N(1)-N(2)        | 1.387(5)   |
| Sn(1)-O(2)        | 2.212(3)   | N(2)-C(8)        | 1.307(6)   |
| C(16)-Sn(1)-C(24) | 153.0(3)   | C(16)-Sn(1)-O(2) | 90.25(18)  |
| C(16)-Sn(1)-O(3)  | 93.84(17)  | C(24)-Sn(1)-O(2) | 90.70(19)  |
| C(24)-Sn(1)-O(3)  | 97.82(19)  | O(3)-Sn(1)-O(2)  | 152.11(13) |
| C(16)-Sn(1)-N(2)  | 101.07(18) | N(2)-Sn(1)-O(2)  | 70.67(13)  |

---

|                  |            |                   |           |
|------------------|------------|-------------------|-----------|
| C(24)-Sn(1)-N(2) | 104.72(19) | O(3)-Sn(1)-N(2)   | 81.47(13) |
| <b>Complex 5</b> |            |                   |           |
| Sn(1)-O(3)       | 2.040(3)   | N(1)-C(7)         | 1.325(6)  |
| Sn(1)-O(2)       | 2.088(3)   | N(1)-N(2)         | 1.404(5)  |
| Sn(1)-C(16)      | 2.126(4)   | N(2)-C(8)         | 1.297(6)  |
| Sn(1)-N(2)       | 2.171(4)   | O(2)-C(7)         | 1.289(5)  |
| Sn(1)-O(5)       | 2.302(3)   | O(3)-C(10)        | 1.330(5)  |
| Sn(1)-Cl(1)      | 2.4403(13) |                   |           |
| O(3)-Sn(1)-O(2)  | 157.23(15) | C(16)-Sn(1)-O(5)  | 90.15(16) |
| O(3)-Sn(1)-C(16) | 98.84(15)  | N(2)-Sn(1)-O(5)   | 81.96(13) |
| O(2)-Sn(1)-C(16) | 100.38(15) | O(3)-Sn(1)-Cl(1)  | 95.43(10) |
| O(3)-Sn(1)-N(2)  | 85.36(13)  | O(2)-Sn(1)-Cl(1)  | 93.35(11) |
| O(2)-Sn(1)-N(2)  | 73.93(13)  | C(16)-Sn(1)-Cl(1) | 99.46(14) |
| C(16)-Sn(1)-N(2) | 170.68(16) | N(2)-Sn(1)-Cl(1)  | 88.35(10) |
| O(3)-Sn(1)-O(5)  | 84.15(13)  | O(5)-Sn(1)-Cl(1)  | 170.31(9) |
| O(2)-Sn(1)-O(5)  | 83.70(14)  |                   |           |

Symmetry transformations used to generate equivalent atoms: Complex 1: #1 = -x, -y, 2-z; Complex 3: #1 = 2-x, 1-y, 1-z; Complex 4: 1-x, 2-y, 1-z.

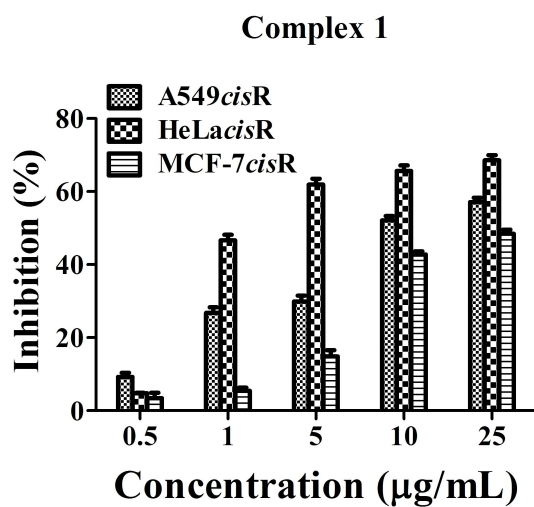

**Fig. S1** The inhibition effects of complex 1 on the three cancer cell lines at different concentration.

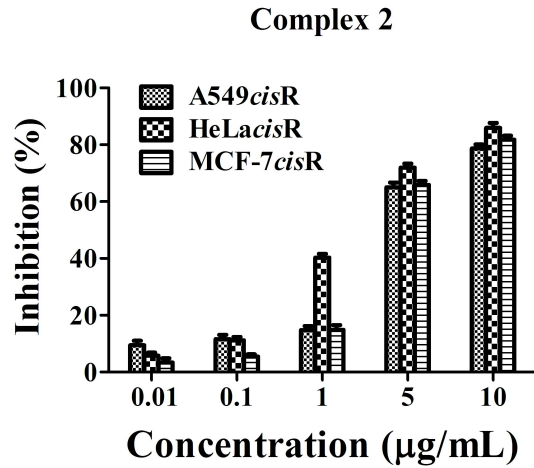

Fig. S2 The inhibition effects of complex 2 on the three cancer cell lines at different concentration.

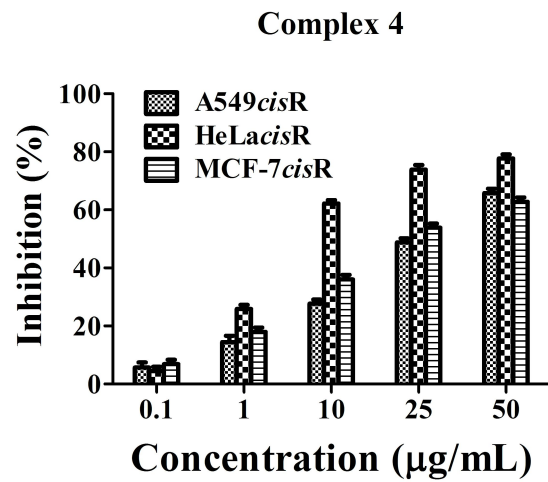

Fig. S3 The inhibition effects of complex 4 on the three cancer cell lines at different concentration.

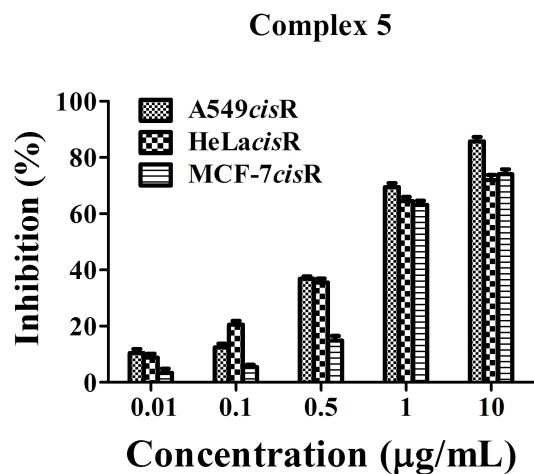

Fig. S4 The inhibition effects of complex 5 on the three cancer cell lines at different concentration.

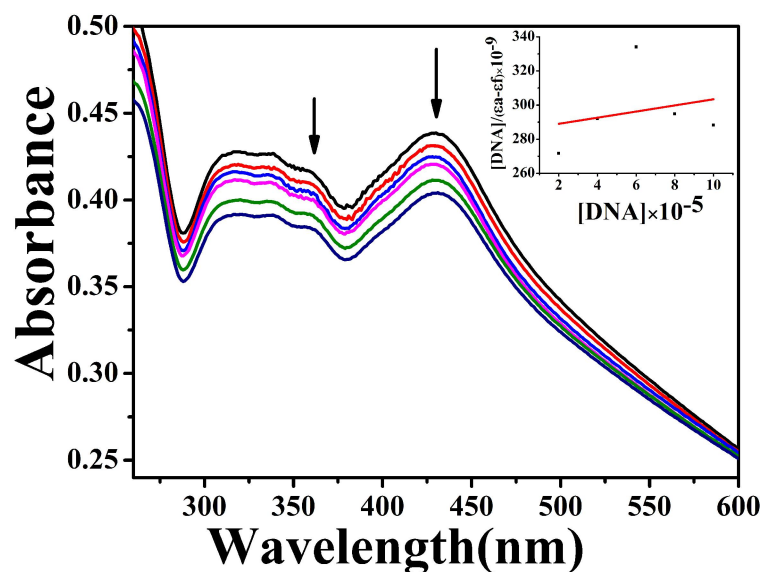

**Fig. S5** UV-vis absorption spectrum of complex 1 (30  $\mu$ M) in the absence and presence of CT-DNA, from 1 to 6,  $[DNA] = 0, 20, 40, 60, 80$  and  $100 \mu$ M, respectively. Arrows show the changes in absorbance with respect to an increase in the DNA concentration (Inset: plot between  $[DNA]$  and  $[DNA]/[\epsilon_a - \epsilon_f]$ ).

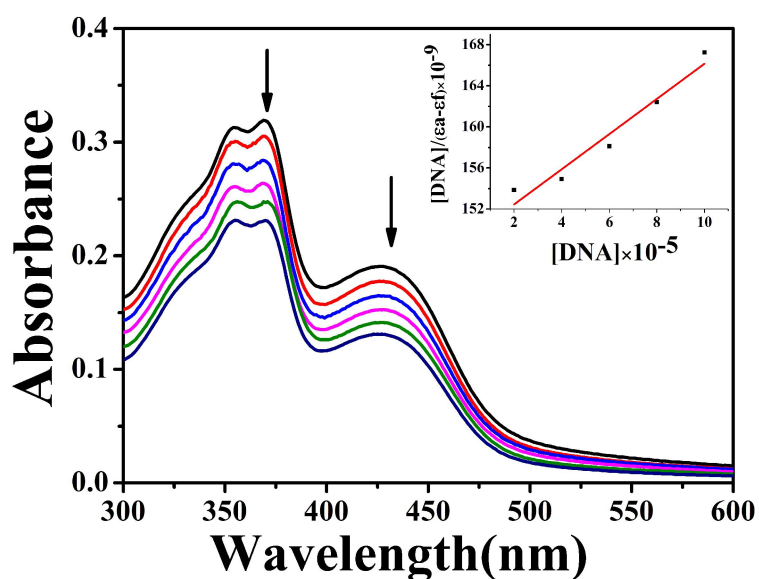

**Fig. S6** UV-vis absorption spectrum of complex 2 (30  $\mu$ M) in the absence and presence of CT-DNA, from 1 to 6,  $[DNA] = 0, 20, 40, 60, 80$  and  $100 \mu$ M, respectively. Arrows show the changes in absorbance with respect to an increase in the DNA concentration (Inset: plot between  $[DNA]$  and  $[DNA]/[\epsilon_a - \epsilon_f]$ ).

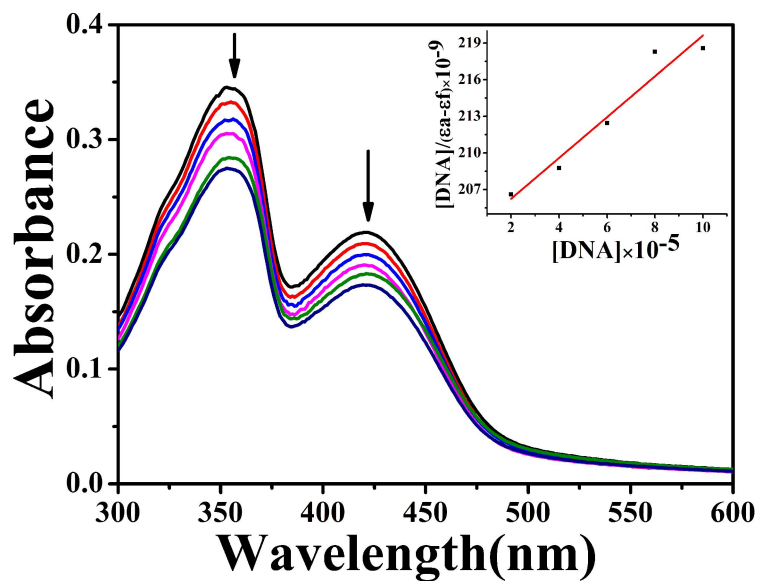

**Fig. S7** UV-vis absorption spectrum of complex **4** (30  $\mu\text{M}$ ) in the absence and presence of CT-DNA, from 1 to 6,  $[\text{DNA}] = 0, 20, 40, 60, 80$  and  $100 \mu\text{M}$ , respectively. Arrows show the changes in absorbance with respect to an increase in the DNA concentration (Inset: plot between  $[\text{DNA}]$  and  $[\text{DNA}]/[\epsilon_a - \epsilon_f]$ ).

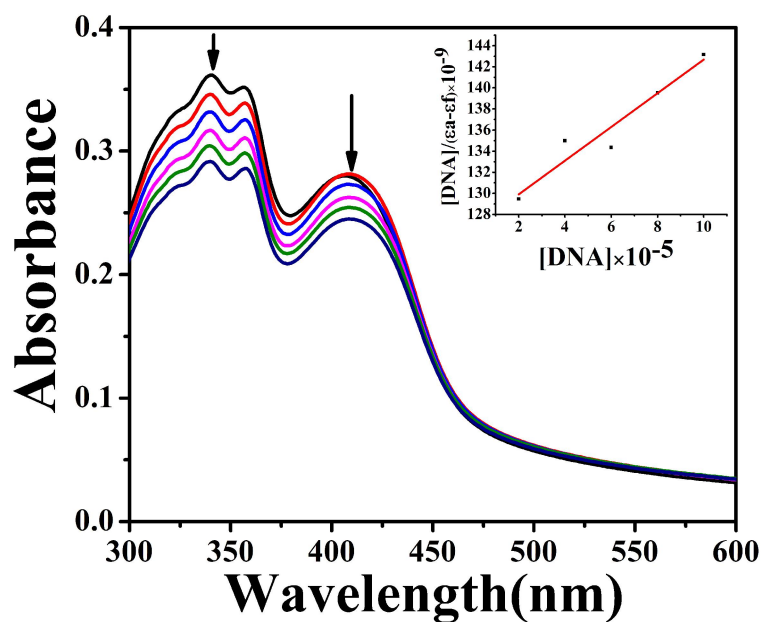

**Fig. S8** UV-vis absorption spectrum of complex **5** (30  $\mu\text{M}$ ) in the absence and presence of CT-DNA, from 1 to 6,  $[\text{DNA}] = 0, 20, 40, 60, 80$  and  $100 \mu\text{M}$ , respectively. Arrows show the changes in absorbance with respect to an increase in the DNA concentration (Inset: plot between  $[\text{DNA}]$  and  $[\text{DNA}]/[\epsilon_a - \epsilon_f]$ ).

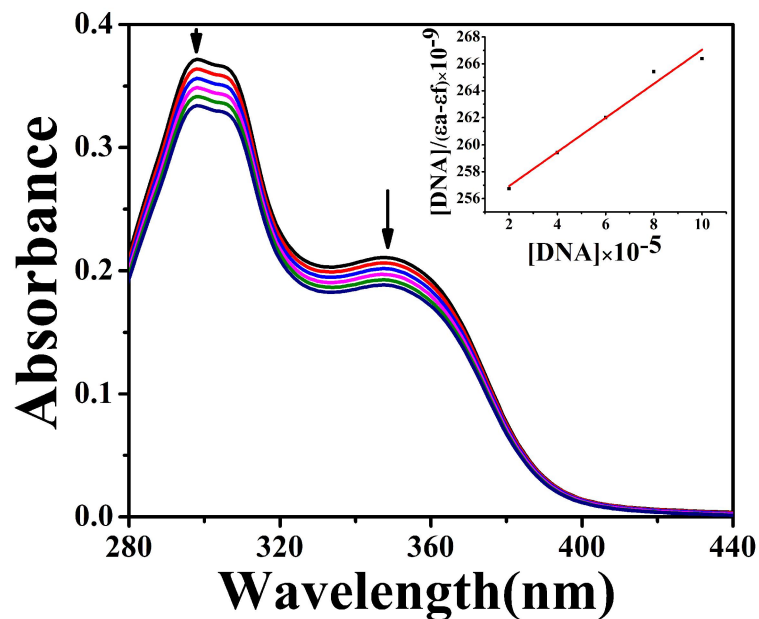

Fig. S9 UV-vis absorption spectrum of ligand HL (30 μM) in the absence and presence of CT-DNA, from 1 to 6,  $[DNA] = 0, 20, 40, 60, 80$  and  $100 \mu\text{M}$ , respectively. Arrows show the changes in absorbance with respect to an increase in the DNA concentration (Inset: plot between  $[DNA]$  and  $[DNA]/[\epsilon_a - \epsilon_f]$ ).

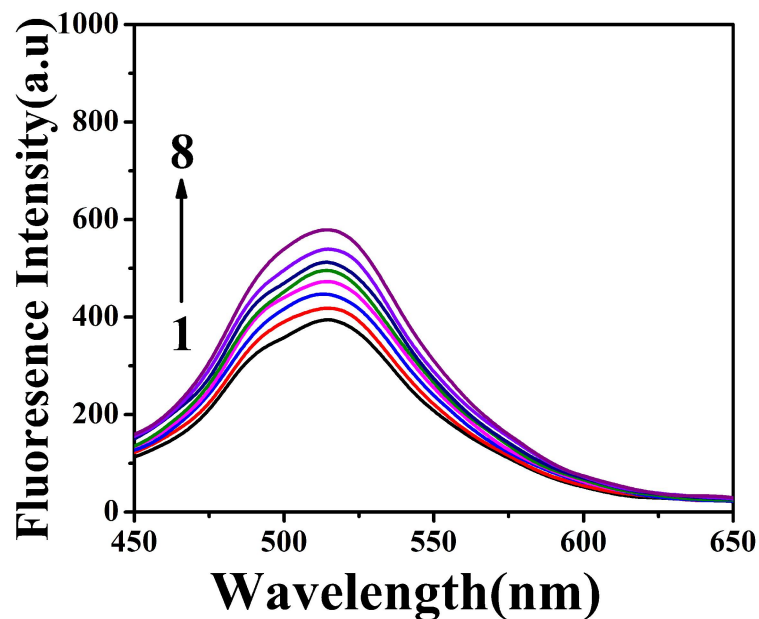

Fig. S10 Effects of the emission spectra ( $\lambda_{\text{ex}} = 346 \text{ nm}$ ) of 3 μM complex 1 with increasing concentrations of the DNA (0 - 250 μM).

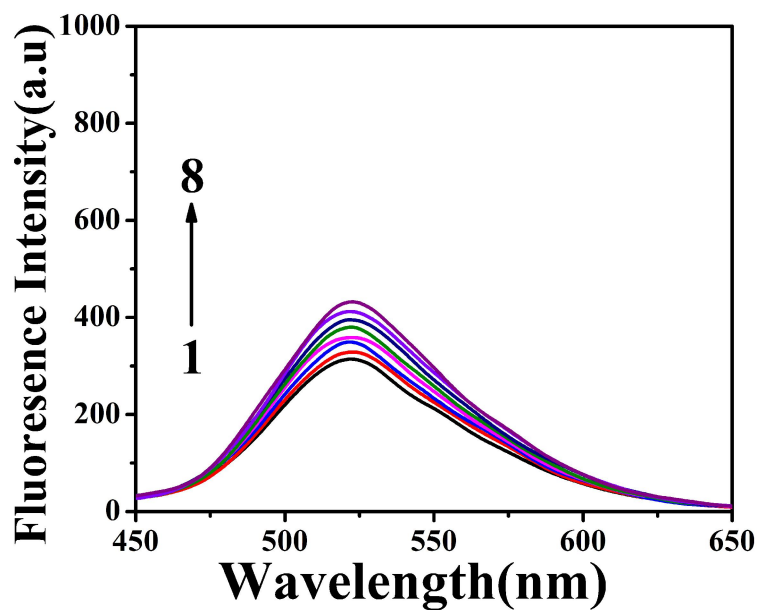

Fig. S11 Effects of the emission spectra ( $\lambda_{\text{ex}} = 346 \text{ nm}$ ) of  $3 \mu\text{M}$  complex 2 with increasing concentrations of the DNA (0 -  $250 \mu\text{M}$ ).

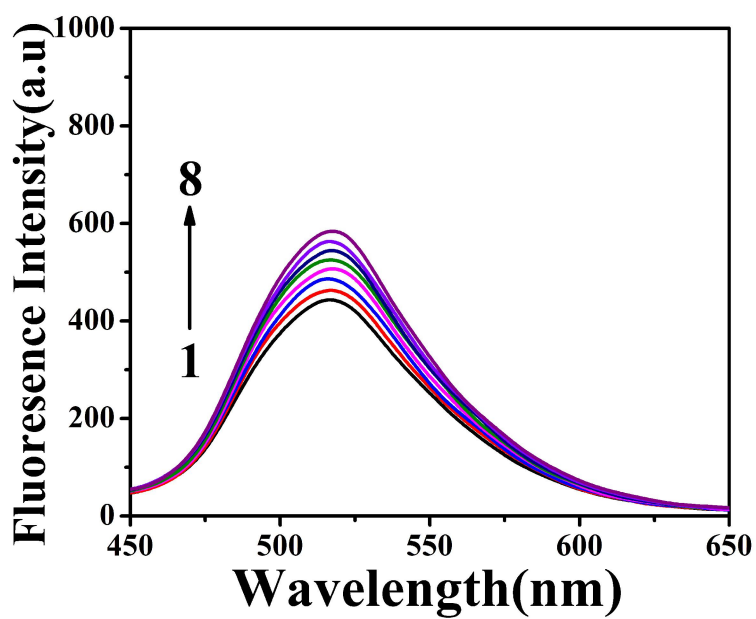

Fig. S12 Effects of the emission spectra ( $\lambda_{\text{ex}} = 346 \text{ nm}$ ) of  $3 \mu\text{M}$  complex 4 with increasing concentrations of the DNA (0 -  $250 \mu\text{M}$ ).



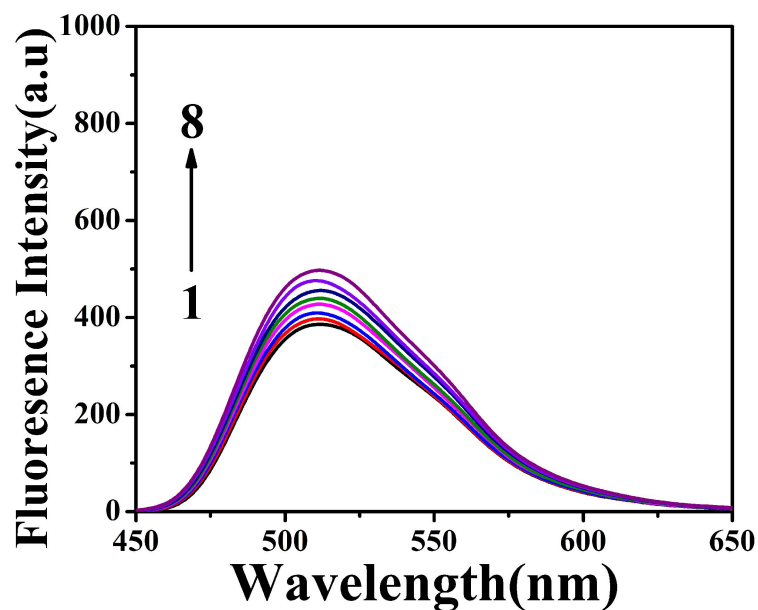

Fig. S13 Effects of the emission spectra ( $\lambda_{\text{ex}} = 346 \text{ nm}$ ) of  $3 \mu\text{M}$  complex **5** with increasing concentrations of the DNA (0 -  $250 \mu\text{M}$ ).

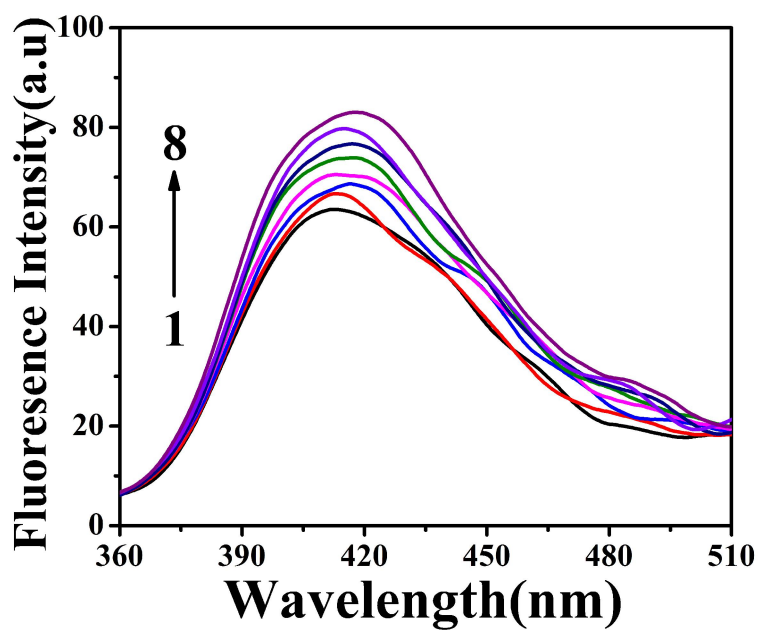

Fig. S14 Effects of the emission spectra ( $\lambda_{\text{ex}} = 346 \text{ nm}$ ) of  $3 \mu\text{M}$  ligand HL with increasing concentrations of the DNA (0 -  $250 \mu\text{M}$ ).

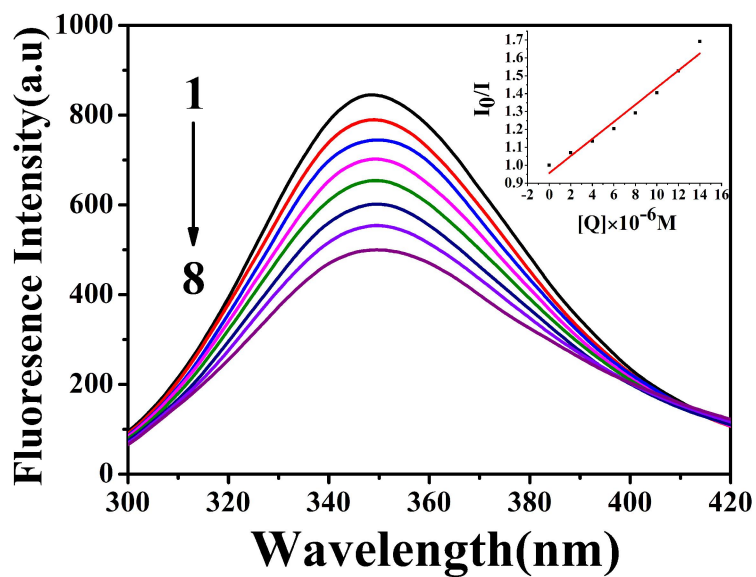

Fig. S15 Effects of complex 1 on the fluorescence spectra of BSA system. [BSA] =  $1.0 \times 10^{-6}$  M, [Complex] = 0, 2, 4, 6, 8, 10, 12 and 14  $\mu$ M, respectively;  $\lambda_{\text{ex}}$  = 280 nm. (Inset: Plot of [Q] vs.  $I_0/I$ ).

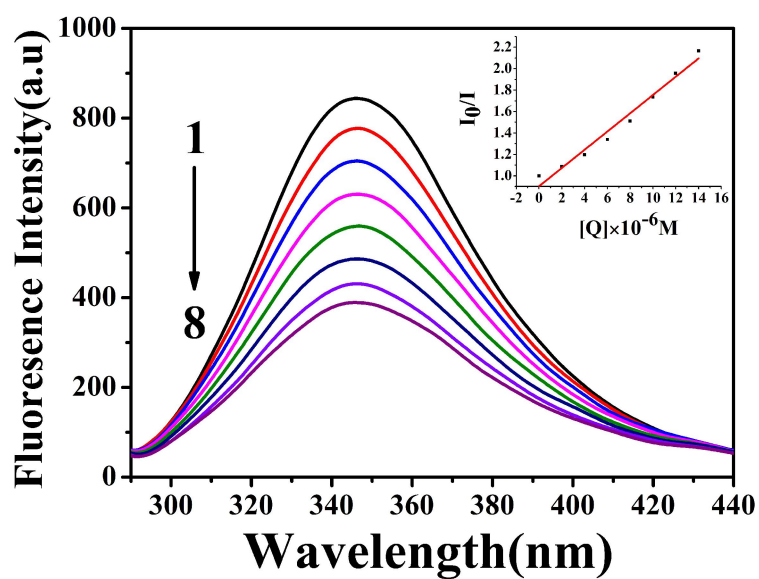

Fig. S16 Effects of complex 2 on the fluorescence spectra of BSA system. [BSA] =  $1.0 \times 10^{-6}$  M, [Complex] = 0, 2, 4, 6, 8, 10, 12 and 14  $\mu$ M, respectively;  $\lambda_{\text{ex}}$  = 280 nm. (Inset: Plot of [Q] vs.  $I_0/I$ ).

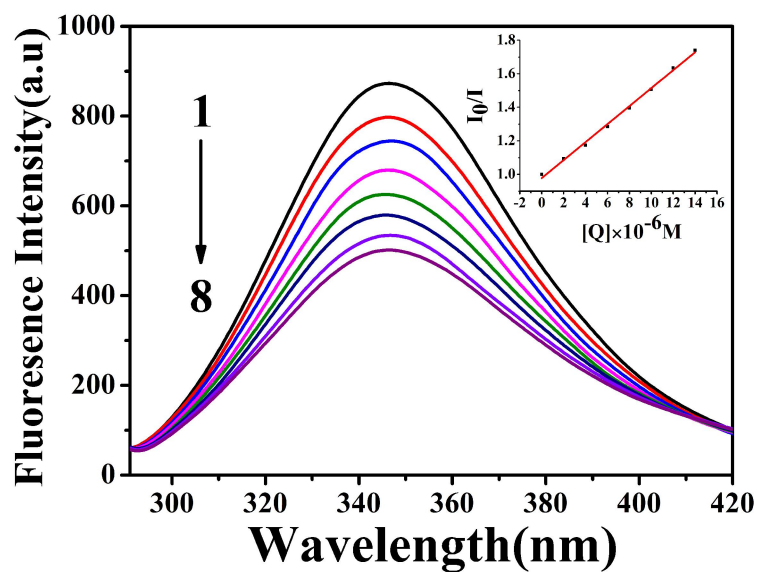

Fig. S17 Effects of complex 4 on the fluorescence spectra of BSA system. [BSA] =  $1.0 \times 10^{-6}$  M, [Complex] = 0, 2, 4, 6, 8, 10, 12 and 14  $\mu$ M, respectively;  $\lambda_{\text{ex}}$  = 280 nm. (Inset: Plot of [Q] vs.  $I_0/I$ ).

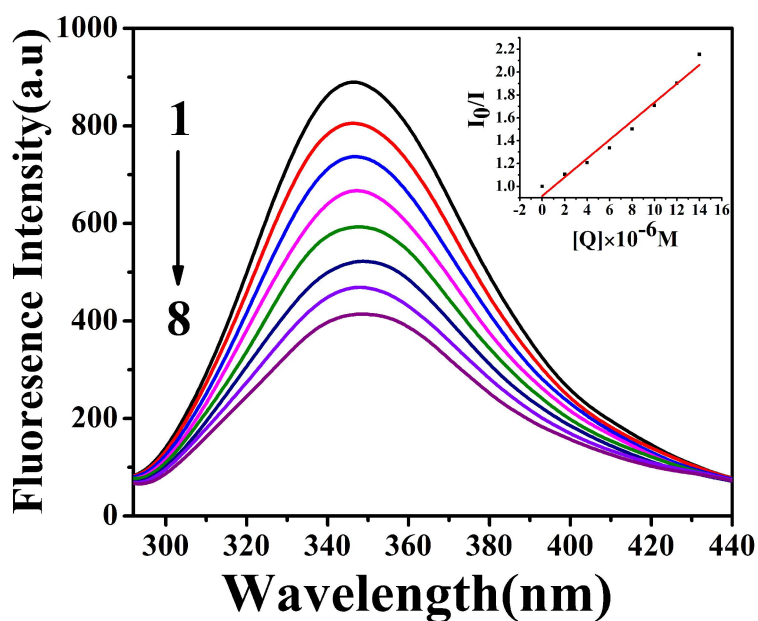

Fig. S18 Effects of complex 5 on the fluorescence spectra of BSA system. [BSA] = 1  $\mu$ M, [Complex] = 0, 2, 4, 6, 8, 10, 12 and 14  $\mu$ M, respectively;  $\lambda_{\text{ex}}$  = 280 nm. (Inset: Plot of [Q] vs.  $I_0/I$ ).

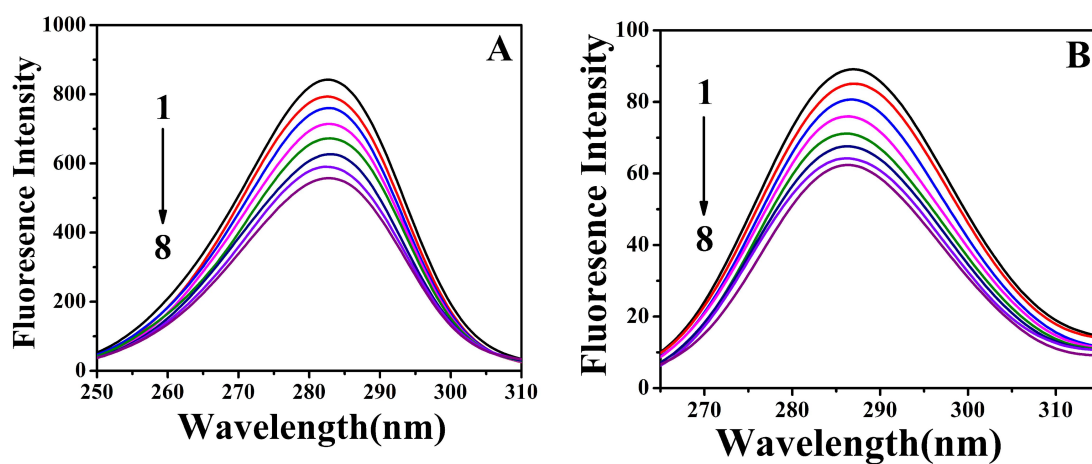

**Fig. S19** Effects of complex 1 on the synchronous spectra of BSA system (A and B). [BSA] = 1.0  $\mu$ M, from 1 to 8, [VOL] = 0, 1, 2, 3, 4, 5, 6 and 7  $\mu$ M, respectively.  $\Delta\lambda = 60$  nm (A) and  $\Delta\lambda = 15$  nm (B).

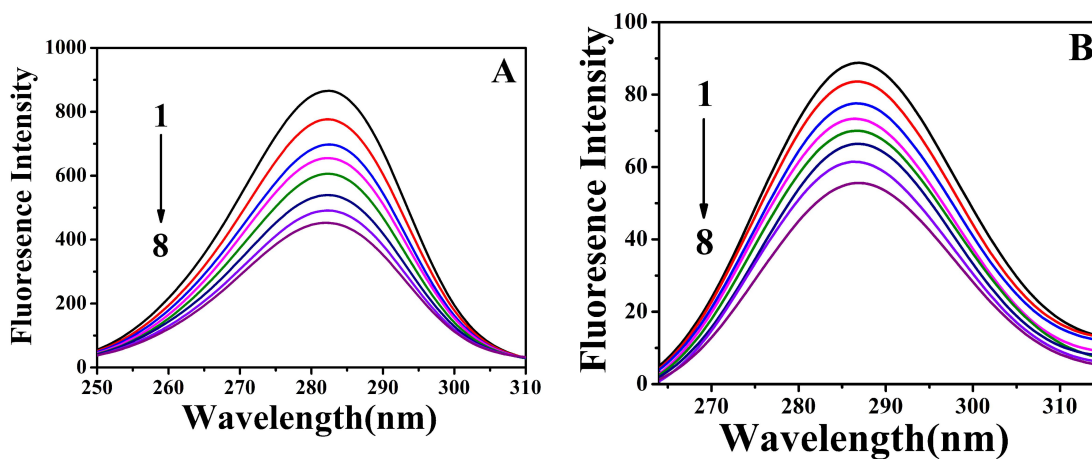

**Fig. S20** Effects of complex 2 on the synchronous spectra of BSA system (A and B). [BSA] = 1.0  $\mu$ M, from 1 to 8, [VOL] = 0, 1, 2, 3, 4, 5, 6 and 7  $\mu$ M, respectively.  $\Delta\lambda = 60$  nm (A) and  $\Delta\lambda = 15$  nm (B).

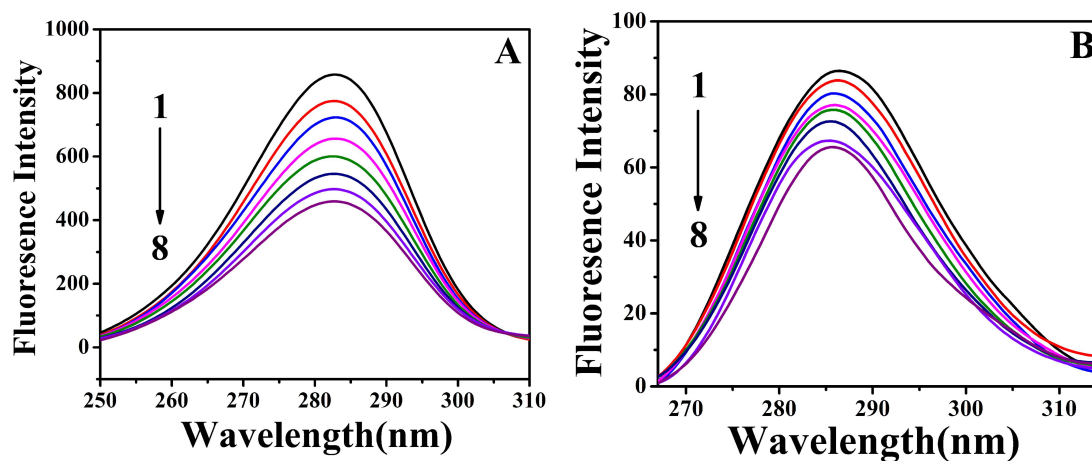

**Fig. S21** Effects of complex **4** on the synchronous spectra of BSA system (A and B). [BSA] = 1.0  $\mu\text{M}$ , from 1 to 8, [VOL] = 0, 1, 2, 3, 4, 5, 6 and 7  $\mu\text{M}$ , respectively.  $\Delta\lambda = 60 \text{ nm}$  (A) and  $\Delta\lambda = 15 \text{ nm}$  (B).

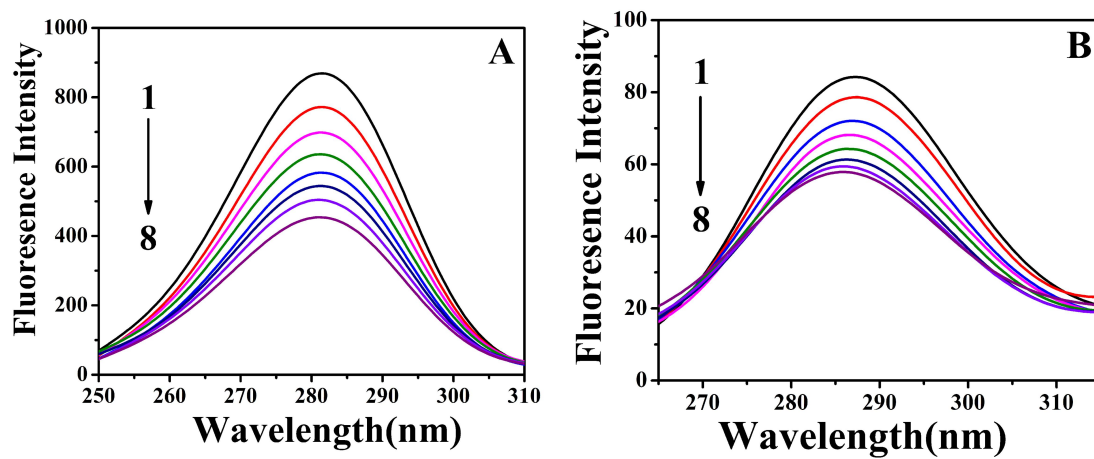

**Fig. S22** Effects of complex **5** on the synchronous spectra of BSA system (A and B). [BSA] = 1.0  $\mu\text{M}$ , from 1 to 8, [VOL] = 0, 1, 2, 3, 4, 5, 6 and 7  $\mu\text{M}$ , respectively.  $\Delta\lambda = 60 \text{ nm}$  (A) and  $\Delta\lambda = 15 \text{ nm}$  (B).
